# Supplementary material
Source: HighWire-hosted journal article supplement (https://dmd.aspetjournals.org/highwire/filestream/66307/field_highwire_adjunct_files/0/Supplemental_Figure_054155.pdf)
Supplement: Supplemental_Figure_054155.pdf [file Supplemental_Figure_054155.pdf]

# Prediction of in vivo rat biliary drug clearance from an in vitro hepatocyte efflux model.

Patrik Lundquist, Johan Lööf, Urban Fagerholm, Ingemo Sjögren, Jenny Johansson, Sveinn Briem, Janet Hoogstraate, Lovisa Afzelius, and Tommy B Andersson

Drug Metabolism and Disposition

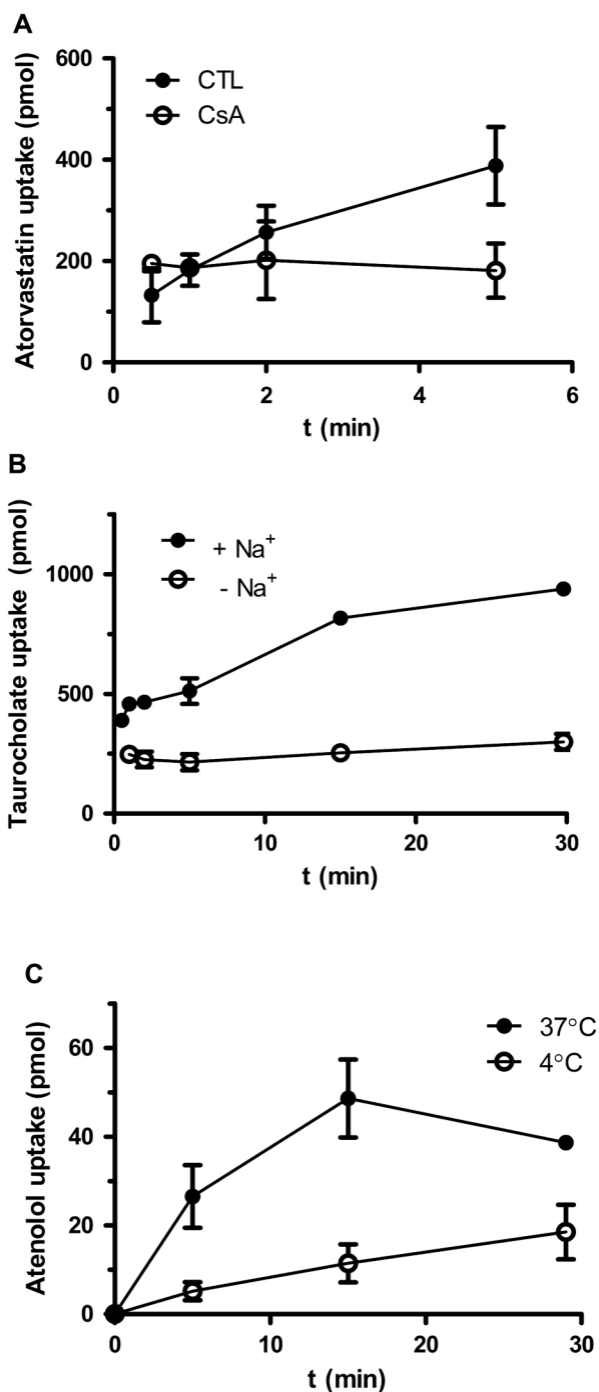

**Supplemental Fig 1.** Effects on drug uptake kinetics in rat hepatocytes of transporter inhibitors and temperature. **A:** Uptake of atorvastatin in plated rat hepatocytes with or without the OATP inhibitor CsA. **B:** Effect of sodium on taurocholate uptake. **C:** Effect of temperature on atenolol uptake in plated rat hepatocytes.
